# Supplementary material
Source: PubMed Central journal article supplement (PMC1560334)
Supplement: rspb20053084s02.pdf [file rspb20053084s02.pdf]

# ELECTRONIC APPENDIX

This is the Electronic Appendix to the article

Niches and not neutrality structure a grassland pioneer guild

by

Lindsay A. Turnbull, Liz Manley  
and Mark Rees

*Proc. R. Soc. B* (doi:10.1098/rspb.2005.3084)

Electronic appendices are refereed with the text; however, no attempt is made to impose a uniform editorial style on the electronic appendices.

Appendix Part 1. Results from the analysis of seedlings in single-sown plots. A) Analysis of deviance from logistic regression of presence/absence data. Table entries give the change in deviance (approximately distributed as a  $\chi^2$ ). B) Results from ANOVA of seedling numbers in occupied plots (at least one seedling present) performed on the square-root transformed data.

A)

| Source                       | Df | Change in deviance | Residual df | Residual deviance | P       |
|------------------------------|----|--------------------|-------------|-------------------|---------|
| Quadrat                      | 19 | 27.51              | 316         | 408.07            | 0.09    |
| Density                      | 1  | 39.48              | 315         | 368.59            | <0.0001 |
| Height                       | 3  | 2.10               | 312         | 366.50            | 0.55    |
| Log seed mass                | 1  | 38.61              | 311         | 327.89            | <0.0001 |
| Species                      | 5  | 86.24              | 306         | 241.64            | <0.0001 |
| Density*height               | 3  | 13.12              | 303         | 228.52            | <0.01   |
| Density*log seed mass        | 1  | 4.98               | 302         | 223.54            | 0.03    |
| Density*species              | 5  | 10.95              | 297         | 212.60            | 0.05    |
| Height*log seed mass         | 3  | 1.83               | 294         | 210.76            | 0.61    |
| Height*species               | 15 | 12.48              | 279         | 198.28            | 0.64    |
| Density*height*log seed mass | 3  | 12.20              | 276         | 186.09            | 0.01    |

B)

| Source                       | Df  | Sum of squares | Mean square | F     | P       |
|------------------------------|-----|----------------|-------------|-------|---------|
| Quadrat                      | 19  | 133.24         | 7.01        | 6.596 | <0.0001 |
| Density                      | 1   | 333.18         | 333.18      | 313.4 | <0.0001 |
| Height                       | 3   | 2.37           | 0.79        | 0.744 | 0.53    |
| Log seed mass                | 1   | 108.06         | 108.06      | 101.6 | <0.0001 |
| Species                      | 5   | 217.72         | 43.54       | 40.96 | <0.0001 |
| Density*height               | 3   | 14.06          | 4.69        | 4.407 | 0.005   |
| Density*log seed mass        | 1   | 49.14          | 49.14       | 46.2  | <0.0001 |
| Density*species              | 5   | 40.53          | 8.11        | 7.625 | <0.0001 |
| Height*log seed mass         | 3   | 3.12           | 1.04        | 0.979 | 0.40    |
| Height*species               | 15  | 6.19           | 0.41        | 0.388 | 0.98    |
| Density*height*log seed mass | 3   | 3.30           | 1.10        | 1.035 | 0.40    |
| Residuals                    | 158 | 167.97         | 1.06        | 1.06  |         |

Appendix Part 2. Key results from the single species analyses. A) Analysis of deviance for presence/absence of seedlings, first-year adults and second-year adults. Table entries give the change in deviance (approximately distributed as a  $\chi^2$  with  $n$  degrees of freedom). For first and second-year adults, *Blackstonia* and *Centaureium* were combined. B) Results from ANOVA performed on the square-root transformed data for number of seedlings, first-year adults and second-year adults in occupied cells. The value of  $F$  and its significance is given (the degrees of freedom in the residual depends on the number of occupied plots). In B) significance is assessed from the full model (with all main effects and higher-order interactions fitted).

A)

|                                | $n$ | Bla     | Cen    | Gen     | Eup     | Lin   | Med     | Rhi     |
|--------------------------------|-----|---------|--------|---------|---------|-------|---------|---------|
| <b>Density</b> (seedlings)     | 1   | 16.5*** | 10.8** | 47.6*** | 17.4*** | 8.83* | 61.3*** | 21.1*** |
| (first-year adults)            |     | 0.06    | -      | 2.26    | 0.71    | 0.44  | 8.58*   | 22.2*** |
| (second-year adults)           |     | -       | -      | -       | 0.92    | -     | 20.8*** | 9.78*   |
| <b>Mix</b> (seedlings)         | 1   | 3.30    | 0.27   | 2.8     | 0.006   | 0.94  | 1.23    | 0.04    |
| (first-year adults)            |     | 2.19    | -      | 0.12    | 0.10    | 0.70  | 2.58    | 0.48    |
| (second-year adults)           |     | -       | -      | -       | 1.51    | -     | 0.18    | 0.02    |
| <b>Density.Mix</b> (seedlings) | 1   | 3.48    | 0.92   | -       | 0.00    | 0.41  | 1.47    | 0.00    |
| (first-year adults)            |     | 2.63    | -      | 2.89    | 0.003   | 0.07  | 16.1*** | 7.75*   |
| (second-year adults)           |     | -       | -      | -       | 0.91    | -     | 17.4*** | 2.43    |

B)

|                                | Bla  | Cen  | Gen      | Eup      | Lin      | Med               | Rhi      |
|--------------------------------|------|------|----------|----------|----------|-------------------|----------|
| <b>Density</b> (seedlings)     | 5.01 | 0.61 | 34.15*** | 126.4*** | 108.5*** | 19.50**           | 292.3*** |
| (first-year adults)            | -    | -    | 15.12**  | 7.34*    | 20.15**  | 9.96 <sup>+</sup> | 43.97*** |
| (second-year adults)           | -    | -    | -        | 0.23     | -        | 27.0**            | 2.80     |
| <b>Mix</b> (seedlings)         | 7.14 | 1.55 | 5.14     | 14.7**   | 19.88*** | 0.01              | 1.79     |
| (first-year adults)            | -    | -    | 0.64     | 3.82     | 0.65     | 0.59              | 1.38     |
| (second-year adults)           | -    | -    | -        | 4.32     | -        | 2.85              | 0.71     |
| <b>Density.Mix</b> (seedlings) | 0.04 | 5.89 | 16.44**  | 4.73*    | 25.26*** | 3.69              | 2.65     |
| (first-year adults)            | -    | -    | 0.09     | 0.06     | 0.20     | 3.51              | 0.19     |
| (second-year adults)           | -    | -    | -        | 0.036    | -        | 0.07              | 0.28     |

Significance levels: +<0.05, \*<0.01 \*\*<0.001, \*\*\*<0.0001.
